# Supplementary material for: Assessing soil bacterial community and dynamics by integrated high-throughput absolute abundance quantification
Source: PeerJ journal article supplement (doi:10.7717/peerj.4514), 2018-03-14

Total bacterial 16S rRNA gene

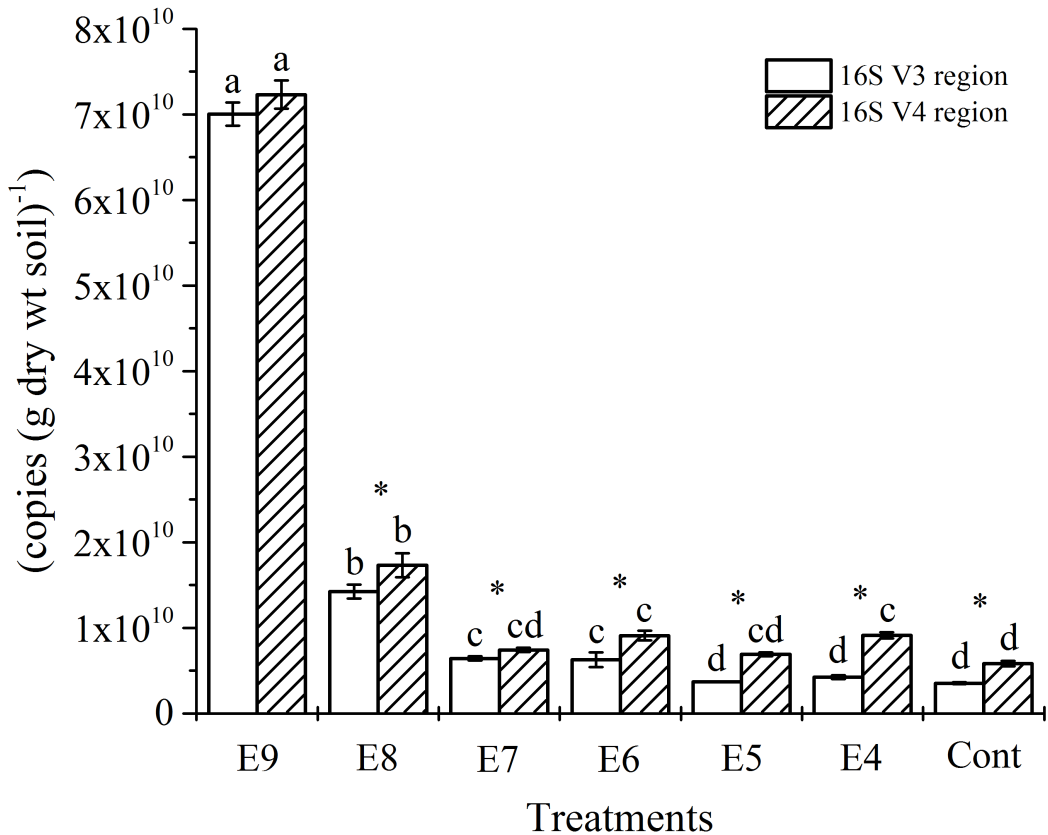

Supplement: Fig._S1.pdf [file Fig._S1.pdf]
