# Supplementary material for: Assessing soil bacterial community and dynamics by integrated high-throughput absolute abundance quantification
Source: PeerJ journal article supplement (doi:10.7717/peerj.4514), 2018-03-14
Supplement: Fig._S2.pdf [file Fig._S2.pdf]

Derivative Reporter (-R)

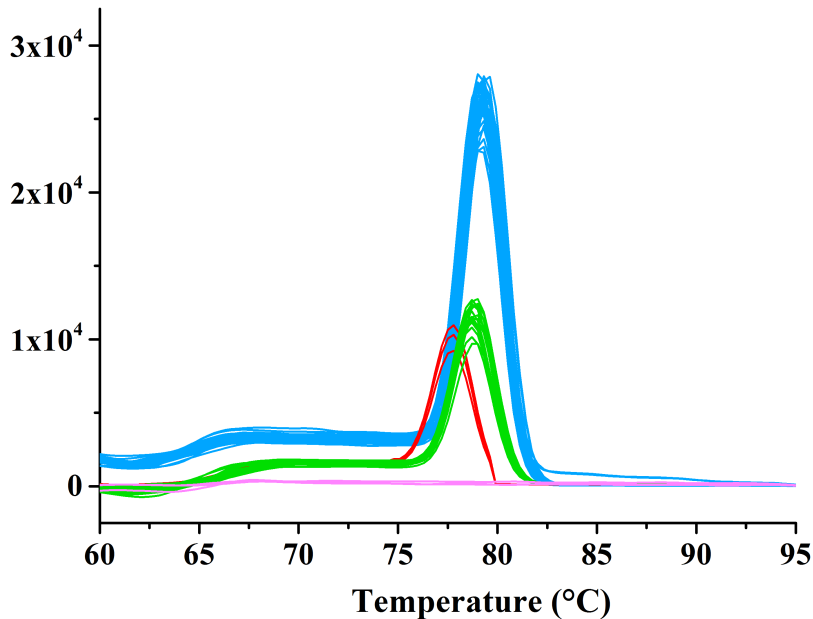

- Std-3.6×10<sup>1</sup>
- Std-3.6×10<sup>2</sup>
- Std-3.6×10<sup>3</sup>
- Std-3.6×10<sup>4</sup>
- Std-3.6×10<sup>5</sup>
- Std-3.6×10<sup>6</sup>
- Std-3.6×10<sup>7</sup>
- Std-3.6×10<sup>8</sup>
- Std-3.6×10<sup>9</sup>
- Cont
- E4
- E5
- E6
- E7
- E8
- E9
- NTC
