# Supplementary material for: Assessing soil bacterial community and dynamics by integrated high-throughput absolute abundance quantification
Source: PeerJ journal article supplement (doi:10.7717/peerj.4514), 2018-03-14

The detected *fliC* gene

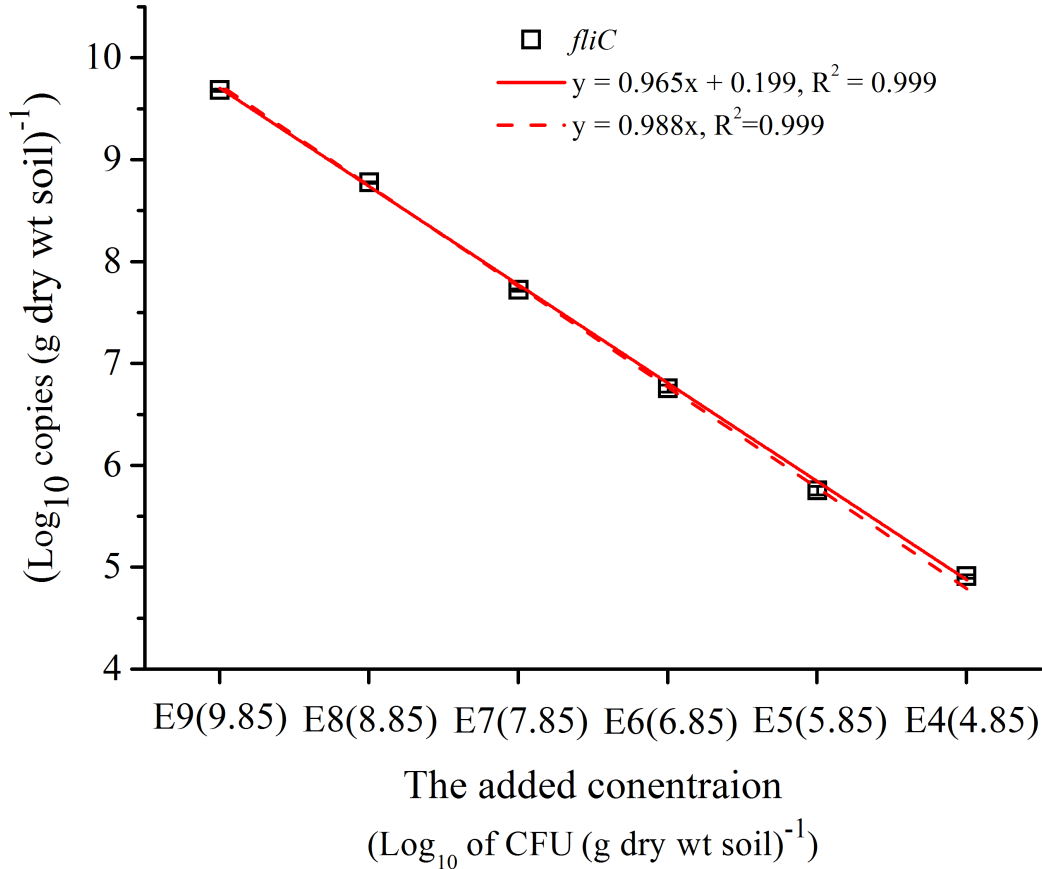

Supplement: Fig._S3.pdf [file Fig._S3.pdf]
